# Supplementary material
Source: Springer Nature journal article supplement (https://www.springermedizin.de/resource/supplementary/12958_2007_386_MOESM9_ESM.pdf/9567770)

15

20

40

60

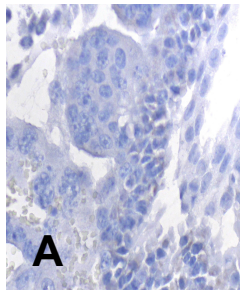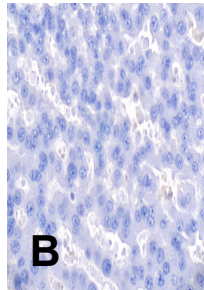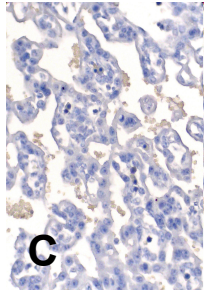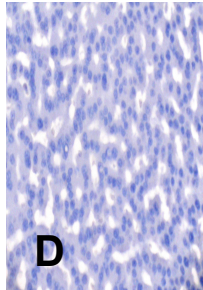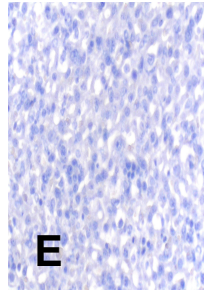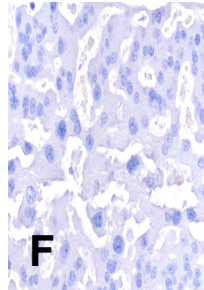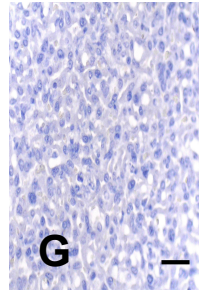

20

40

60

40

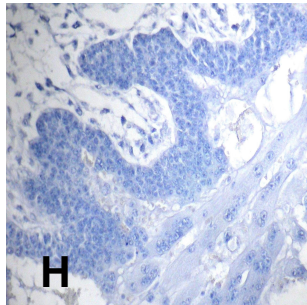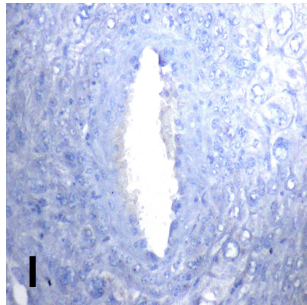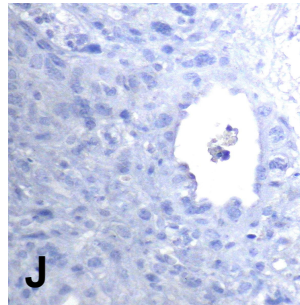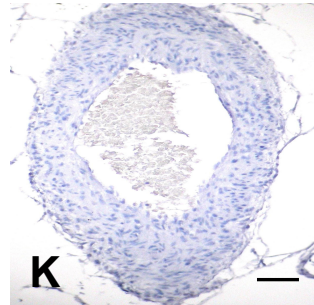

Supplement: MOESM9 [file 9567770]
